# Supplementary material
Source: Springer Nature journal article supplement (https://www.springermedizin.de/resource/supplementary/13041_2009_40_MOESM4_ESM.pdf/25657392)

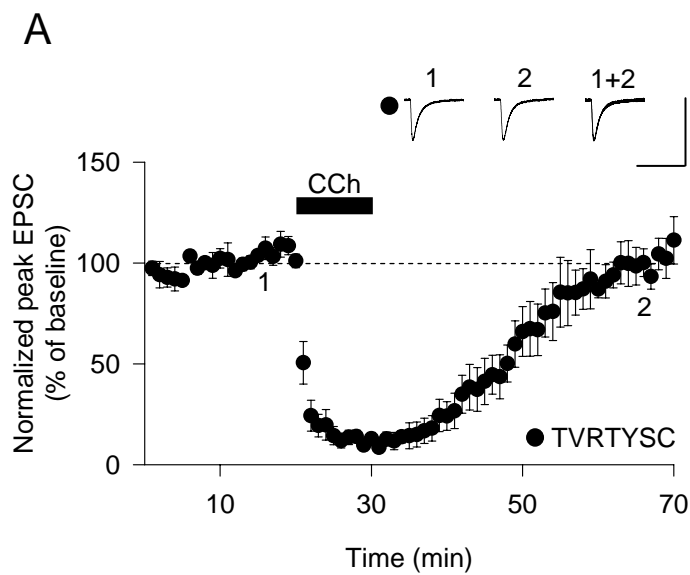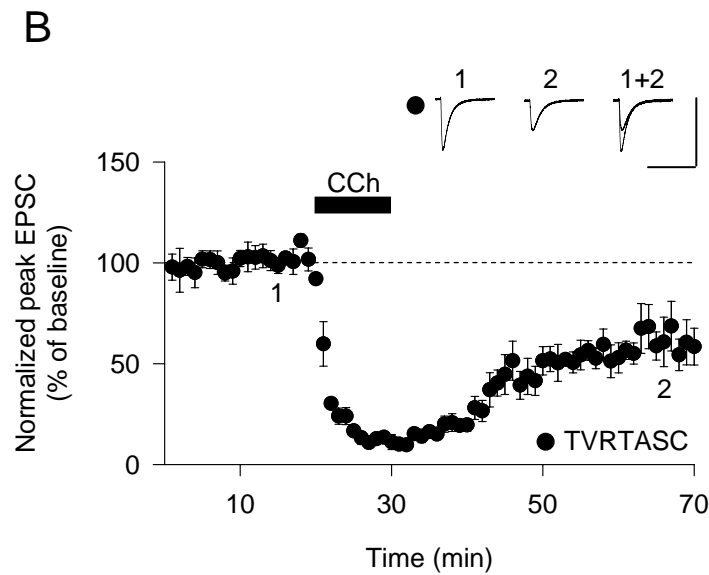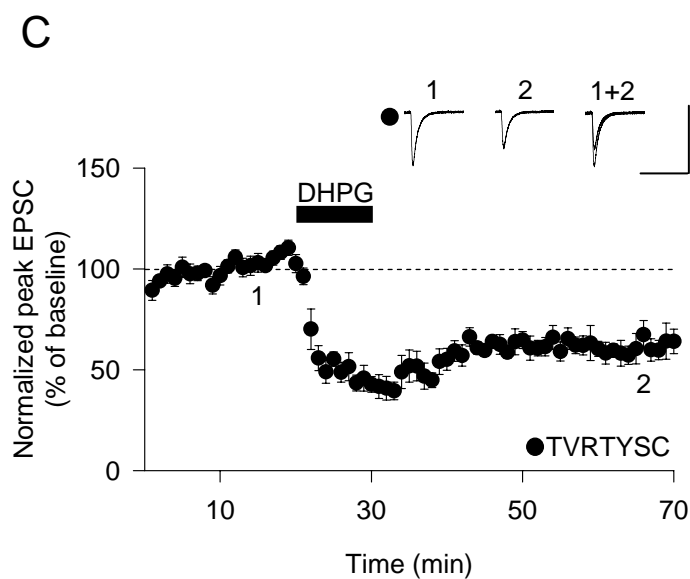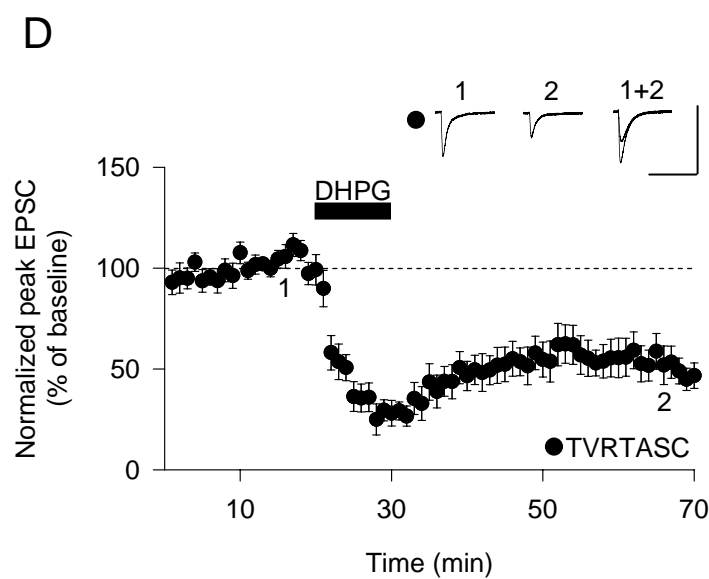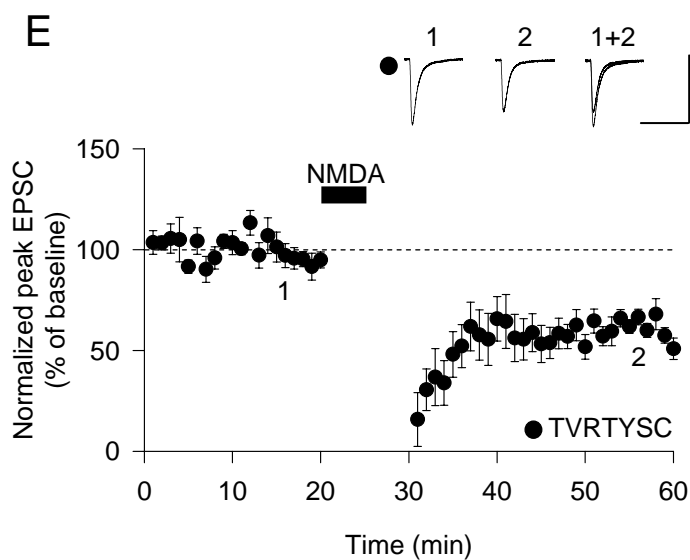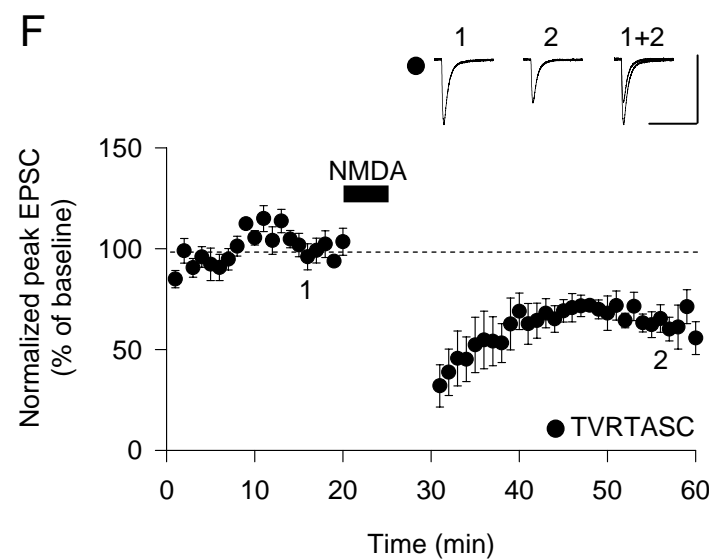

Supplement: MOESM4 [file 25657392]
